# Supplementary material for: Implementation of advance care planning decision aids for patients undergoing high-risk surgery: A field-testing study
Source: Research Square preprint supplement (doi:10.21203/rs.3.rs-1566569/v1), 2022-04-27
Supplement: Supplementary file 1 [file 81c636cf47128f8d495fbcc9.xlsx]

## Sheet: Table1
	Table 1 . Content of patient decision aids used in this study
	Chapter	Contents
	PtDA_A
	Total number of pages	20
	Option	Do not communicate your ACP’s wishes to surrogate decision-makers and health care providers.
		Communicate your ACP's wishes to surrogate decision-makers and health care practitioners.
	Step 1	・Description of the situation and treatment in the event of life crisis.
	Step 2	ACP steps
		About surrogate decision-makers
		About the discretion
		Writing down the patient’s values
	Step 3	Advantages and disadvantages of options
		1 The patient’s wishes are always reflected in the treatment
		2 Consideration of ACP may increase preoperative anxiety.
		3 Augmenting the surrogate decision-maker’s anxiety by talking about ACP to patients before surgery
		4 Mental burden on surrogate decision-makers in making proxy decisions
		5 Change in confidence of surrogate decision-makers with and without prior ACP discussions
	Step 4	Value clarification exercise
	Step 5	Guidance in decision-making and decision
	Supplement	Voice of ICU survival
		Voice of healthcare providers
	PtDA_B
	Total number of pages	14
	Option	Continue to receive all treatment regardless of survival rate
		Discontinue life-sustaining treatment when the survival rate decreases
	Step 1	How do you consider your hopes and wishes for life-sustaining treatment?
	Step 2	Physical conditions that reduce survival rates (each organ)
		Treatment in ICUs (ventilators, assisted circulatory devices, dialysis, sedatives and analgesics, vasopressor, blood transfusion, and nutrition)
		Withdrawal/withholds life-prolonging treatment
	Step 3	Advantages and disadvantages of options
		1 About lifesaving treatment
		2 About the survival rate
		3 Ability to return to prehospital life after discharge
		4 Mental influence of surrogate decision-makers
		5 About the cost of medical care
		6 About cardiopulmonary resuscitation
	Step 4	Value clarification exercise
	Step 5	Guidance in decision-making and decision

## Sheet: Table2
	Table 2. Characteristics of patients and their families dyads (N = 14)
	Characteristics	Patients	Families
		（n = 7）	(n = 7)
	Age, years, mean ± SD (range)	61.1 ± 11.6 (39–75)	49.9 ± 13.2 (30–66)
	Sex
	Female	5	3
	Male	2	4
	Patients with cancer	6
	Stage Ⅰ/Ⅱ	4
	Stage Ⅲ/Ⅳ	2
	Medical histories
	Yes	7
	No	0
	Employment
	Full-time	3	3
	Part-time	1	1
	Unemployed	3	2
	Past experience with relatives’ end-of-life decision-making
	Yes	1	2
	No	6	5
	Relationship with patient
	Partner		5
	Children		2
	Time spent in meetings with the researcher, min, mean (range)
	Before hospitalization	0	0
	On admission	20 (5–40)	10.7 (5–40)
	During hospitalization	30.7 (15–65)	12.4 (0–30)
	After discharge	52.8 (40–60)	47.1 (15–60)
	Decision preference
	The physician will decide, but I will consider my opinion.	5
	I will decide, but I will consider the physician's opinion.	2

## Sheet: Table3
	Table 3. Decision-making outcomes of the study participants (N=14)
			Before hospitalization	On admission	After discharge
	Patients (N=7)
	PtDA_A, SURE test
	4 points		1	4	6
	≥3 points		6	3	1
	Mean ± SD		2.1 ± 1.2	3.4 ± 0.8	3.9 ± 0.4
	PtDA_B, SURE test
	4 points		0	5	6
	≥3 points		7	2	1
	Mean ± SD		2.3+0.9	3.7 ± 0.8	3.9 ± 0.4
	Recognizing the need for prior ACP discussions (NRS: 0–10)			8.7 ± 1.3	9.1 ± 0.9
	HADS
	HADS-A		9.6 ± 4.1	6.7 ± 5.0	6.0 ± 4.1
	HADS-D		5.7 ± 3.8	4.0 ± 3.8	4.0 ± 2.7
	HADS-T		15.3 ± 7.5	10.7 ± 8.4	9.9 ± 5.9
	Families (N=7)
	Recognizing the need for prior ACP discussions (NRS: 0–10)			9.57 ± 1.1	9.0 ± 1.3
	HADS
	HADS-A		8.0 ± 4.9	7.4 ± 6.2	8.0 ± 4.2
	HADS-D		4.6 ± 4.7	3.9 ± 5.3	5.6 ± 4.6
	HADS-T		11.3 ± 10.2	11.3 ± 11.2	13.6 ± 8.2
	Confidence in proxy decision-making (NRS: 0–10)		6.1 ± 2.5	7.7 ± 1.4	8.1 ± 1.5
	Patients/families (N=14)
	Concordance of decision-making		6	10	14
	HADS-A, HADS subscale for anxiety; HADS-D, HADS subscale for depression; HADS-T HADS total score.

## Sheet: Table4
	Table 4. Patient’s process with patient decision aids for advance care planning
	Category	Subcategory
	Before hospitalization
	I want to think about who to use PtDAs with.	Select people one can trust.
		I want to think by myself first.
		Patients worry about how much to tell their family, including information about one's illness.
		Think about what to tell whom.
		Think along with own feelings
		be unwavering in decision to operate
		I don't want to use the PtDAs alone.
	I want to answer for life-prolonging treatment myself.	Clear one's mind
		I can't discuss about life-prolonging treatment's needs when I can't decide for myself.
	Worry about how to tell one's family about life-prolonging treatment.	I recognize it's important to talk to my family.
		I understand the need to tell my family, but I can't.
		Agonize over whether to tell my family about my feelings
		Express my feelings while checking the reaction of my family
		Plan the timing and sequence of talking to my family in myself
	PtDAs aid to clear my values and desires.	Have your healthcare provider or family members respect my wishes?
		Expressing one's values and wishes is a first experience, and difficult
		I want to be prepared so that my family will not be in distress in case of a sudden turn over the worse.
	Patients have difficulty discussing with their families.	Sense the concerns and anxieties of family members
		Look for a chance to have a conversation with one's family
		Care for each other
		Look for positive topics while peer round checking on one's family
		Believe that unconcealed communication leads to trust
		Look for ways to cope with one's anxiety
		Be never able to hear the true feelings of one's family
	Be aware of my negative feelings.	Be concerned that the use of the guide will trigger hidden fears about surgery.
		Be distressed to imagine family grieving by telling them how my thinking.
	Relationship with healthcare providers.	Start looking for a trusted healthcare provider who can express one's feelings.
		Be unable to express one's uneasiness directly
		Not yet have enough trust to want to share my fears.
	Use PtDAs to collect new medical information to assist decision-making.	Re-examine and better understand the treatment
		Share information about treatment with my family
		Understanding again that there is a risk, but don't hesitate to undergo surgery.
		Take time to consider treatment options for prolonging life.
	On admission
	Express one's feelings to someone one can trust.	Tell your healthcare provider that my feelings are important, but if something suddenly changes worse, I will accept the treatment my family requests.
		Make it clear to the healthcare provider that one does not want life-prolonging treatment.
		Express the researchers that I would like to discuss the matter with a healthcare provider again, as they may be upset if something happens suddenly worsen.
	Confirm one's decision	Communicate and share the decision-making process with researchers.
		Communicate the discretion to the surrogate decision-maker(families).
		Relieved to have received approval from surrogate decision-makers(families), researchers / healthcare providers.
	After discharge
	Consider a relationship with health care providers	Think about who to continue discussing my ACP with
		It is considered that the same healthcare provider cannot be consulted indefinitely in an acute care hospital.
		I want to be an active participant in future treatment decisions
		I want to express my thoughts on treatment to the physician.
		Difficult to find myself a healthcare provider who would like to discuss ACP.
	Want to review the PtDAs repeatedly.	Check the difference between one's decision before surgery and one's current thoughts.
		I want to continue to use PtDAs to change the way I think about life-prolonging treatment when the treatment or condition changes.
		I want to continue to talk to healthcare providers and my family.
	The satisfaction of being able to discuss my feelings with my family.	Feel that one's family cares about one.
		Feel accepted by one's family.
		Gain the comfort of having one's feelings understood.
